# Supplementary material for: Deregulation of Exo70 Facilitates Innate and Acquired Cisplatin Resistance in Epithelial Ovarian Cancer by Promoting Cisplatin Efflux
Source: MDPI journal article supplement (doi:10.3390/cancers13143467), 2021-07-11

Figure 2.

①

OVCAR3  
vector Exo70  
上 Exo70  
下 Actin

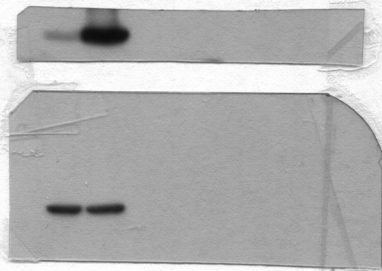

②

SKOV-3  
shCtrl shExo70-1 shExo70-2  
上 Exo70  
下 Actin

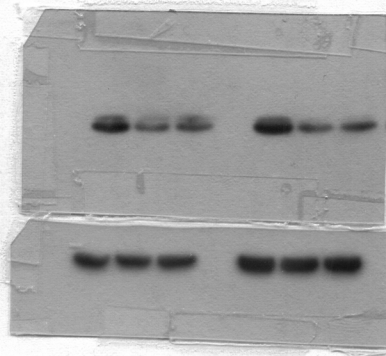

③

OVCAR3  
vector Exo70  
Cisplatin( $\mu$ M) 0 12.5 25 50 0 12.5 25 50  
上 rH2AX  
中 Actin  
下 Exo70

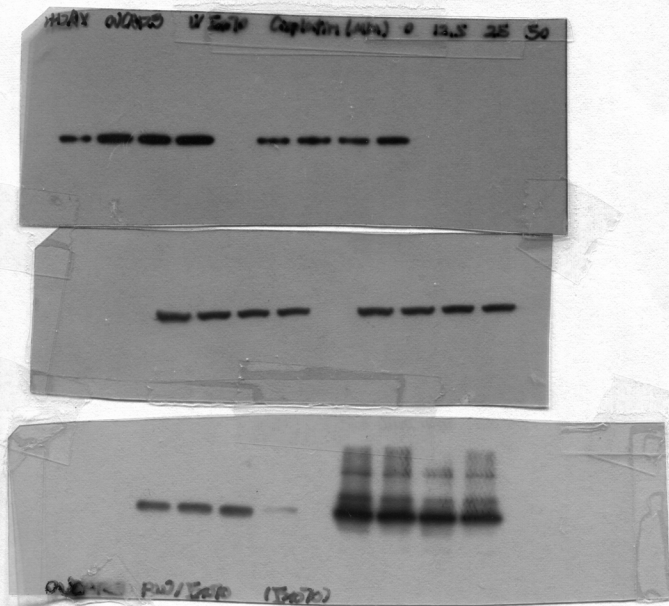

④

SKOV-3  
shCtrl shExo70-1 shExo70-2  
Cisplatin( $\mu$ M) 0 12.5 25 50 0 12.5 25 50 0 12.5 25 50  
上 Exo70  
中 rH2AX  
下 Actin

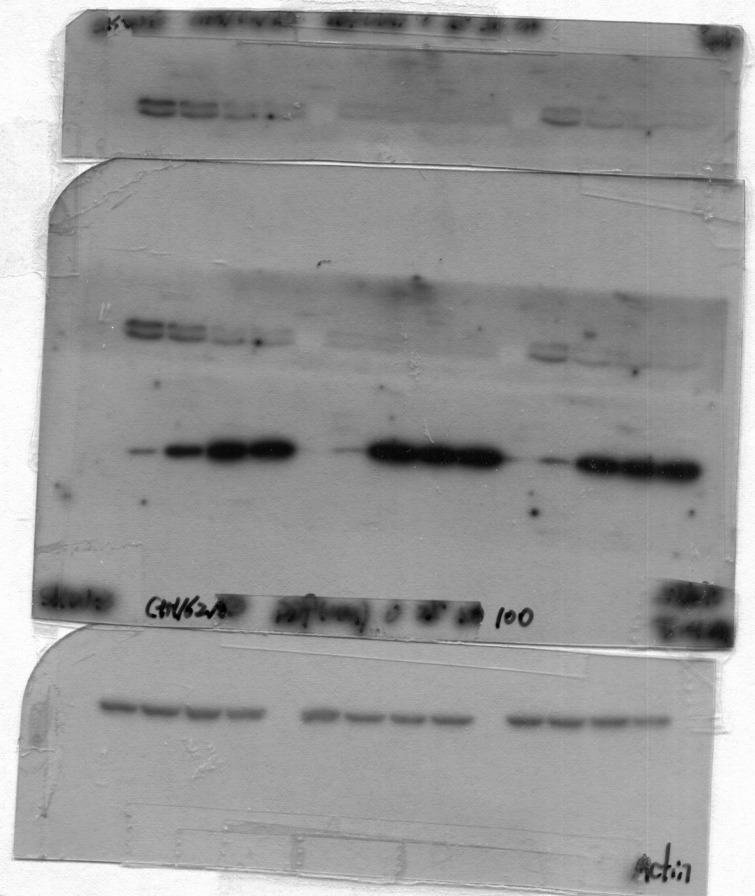

Figure S2.

OVCAR3 SKOV-3 上 Exo70 下 Actin

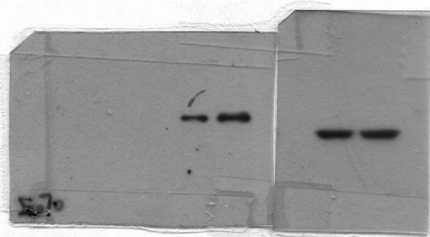

① Dot Blot

左 OUCAR3 ; 右 SK-OV-3  
Vector Iso70 shCtrl shIso70-1 shIso70-2

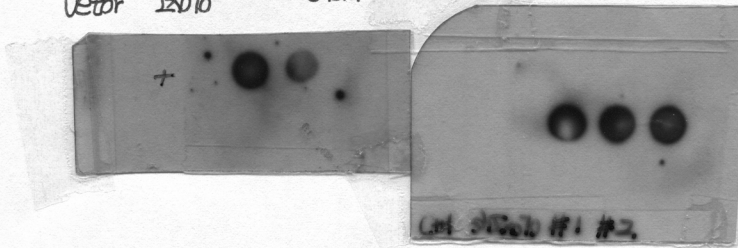

②

左 → 右

Sec15, Sec3, Sec5

上 ↓ 下

目标蛋白, Iso70, Actin

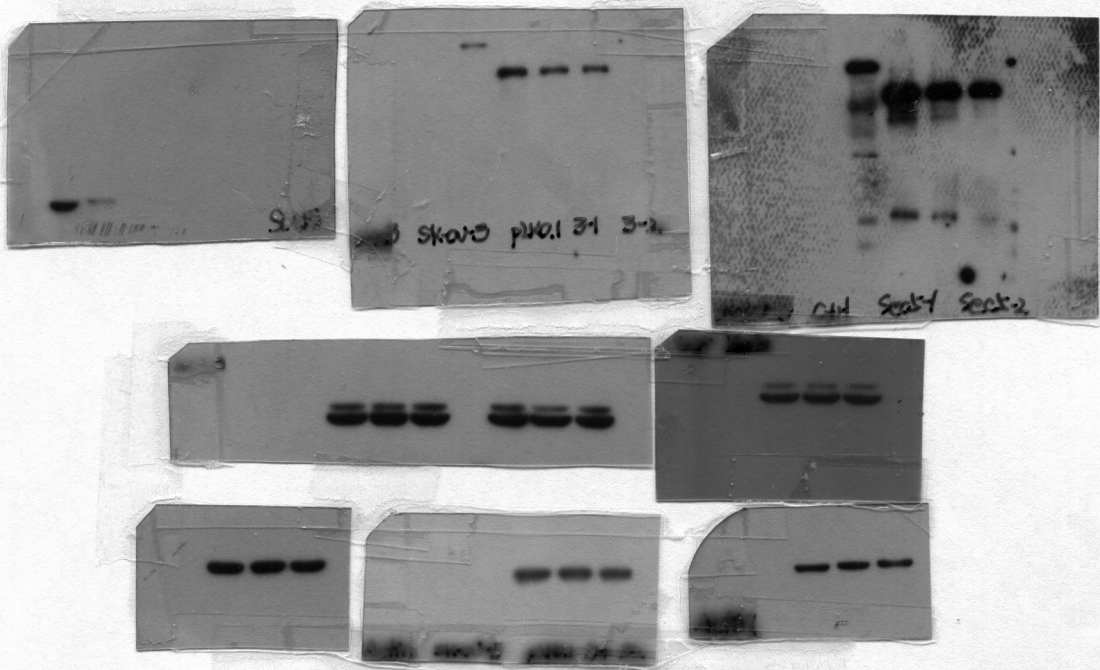

③

左 ATP7A | 右 ATP7B  
Actin  
左 7A 右 7B

Figure 3

ATP7A →

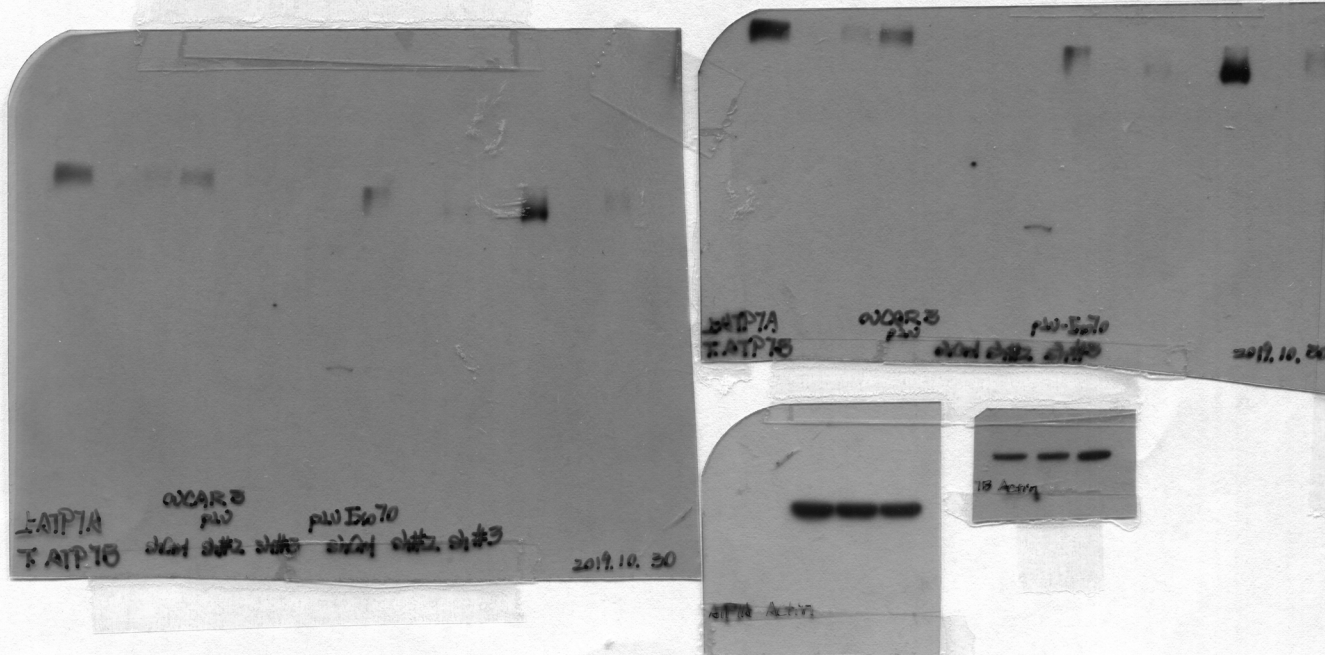



Figure 4

① A2780 A2780CS 左 Exo70 右 Actin

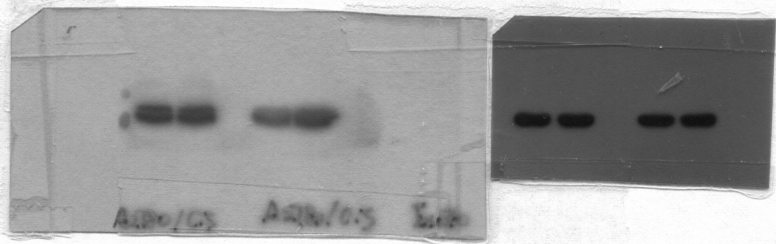

② A2780 A2780CS  
Cisplatin(μM) 0 50 100 : 0 50 100

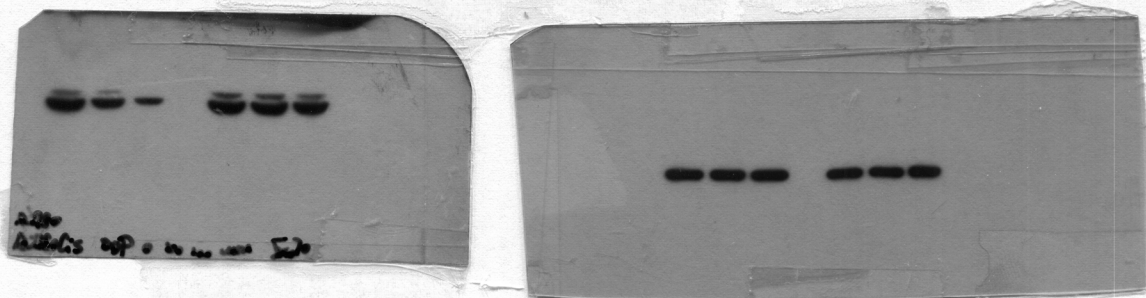

③ A2780CS / A2780

CHX(μM) 0 24 36 48 60 72 h.

上 Exo70

下 Actin

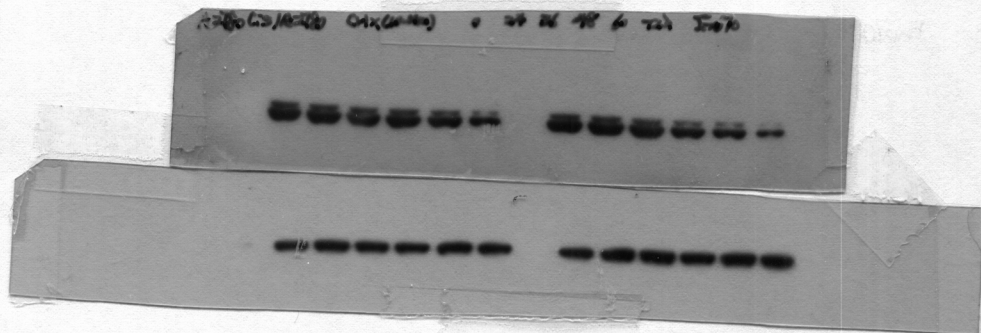

④

A2780CS / A2780

CHX(μM) 0 24 36 48 60 72 h.

Cisplatin 12.5 μM

上 Exo70

下 Actin

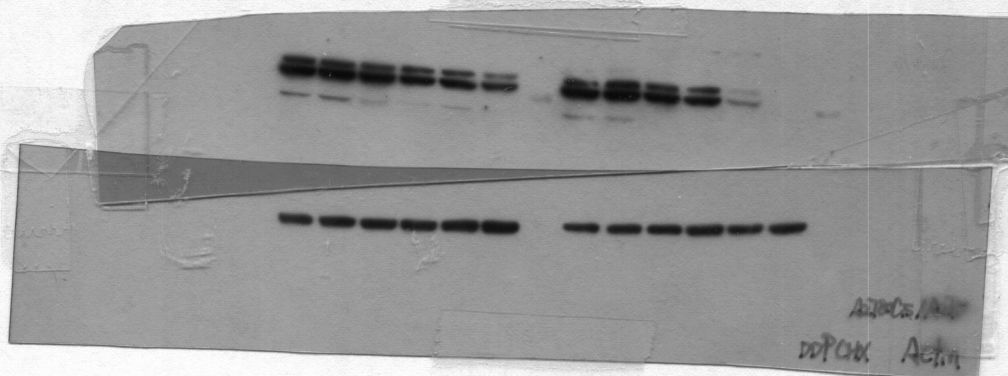

MG132(-)/(+)

CHX (10μM) 0 12 24 36 48 60 72h

OVCAR3

Exo70

OVCAR3 (Exo70)

Actin

Actin

SK-OV-3

Exo70

SK-OV-3 (Exo70)

Actin

Actin

NH4Cl(-)/(+)

CHX (10μM) 0 24 36 48 60 72h

OVCAR3

Exo70

OVCAR3 Exo70 (-/+ NH4Cl) 0 24 36 48 60 72h

Actin

SK-OV-3

Exo70

Exo70

SK-OV-3 CHX 0 24 36 48 60 72h (左: 左+NH4Cl) (右)

Actin

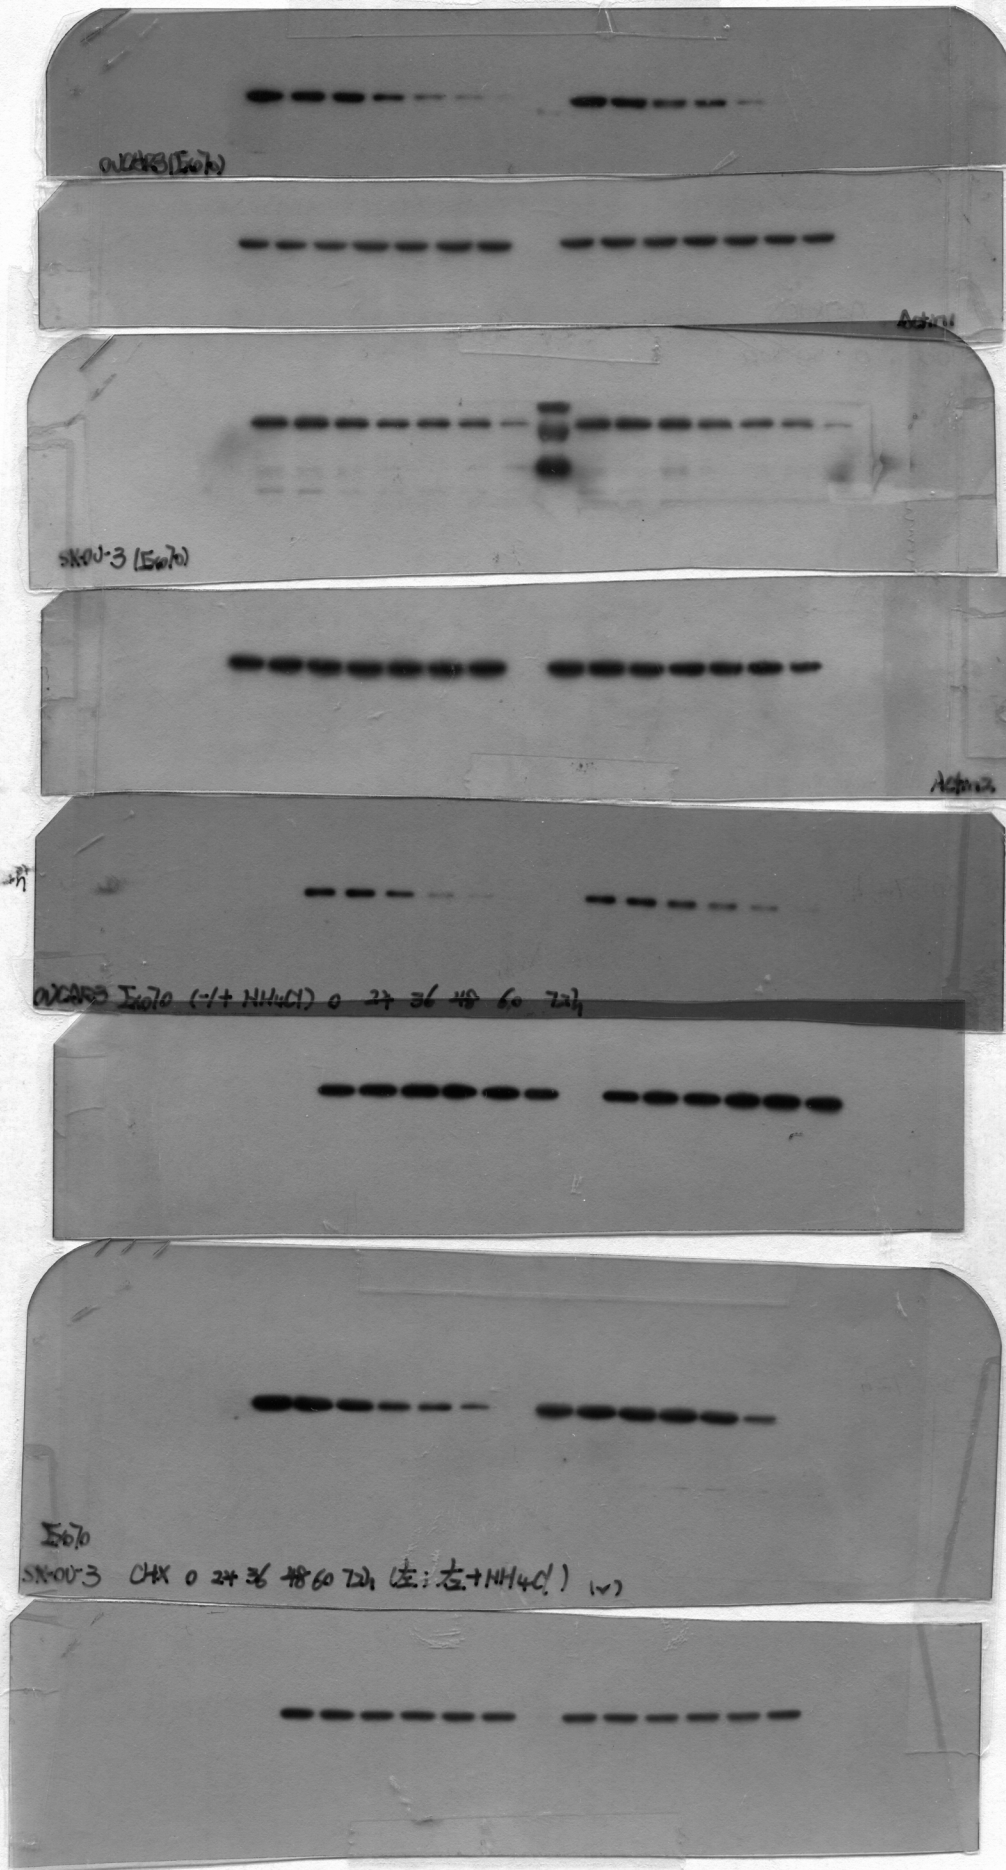



A2780

CHX (10 μM)

Fig 55  
MG132 (-) / (+)  
0 12 24 36 48 72 h

Cisplatin (25 μM)  
72 h

↑ E270  
T Actin

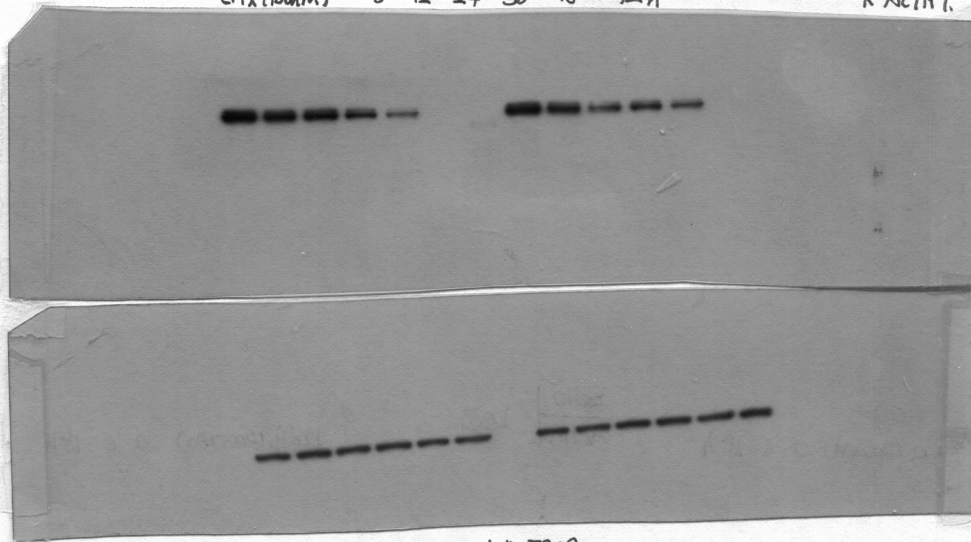

A2780 / A2780CS

左右 E270

Bcl-1

Bcl-2

β-actin

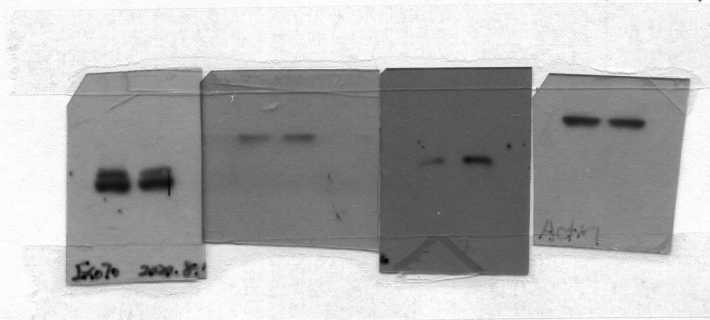

Figure 5

A2780

MG132 (-) / (+)

CHX 0 12 24 36 48 60 72 h

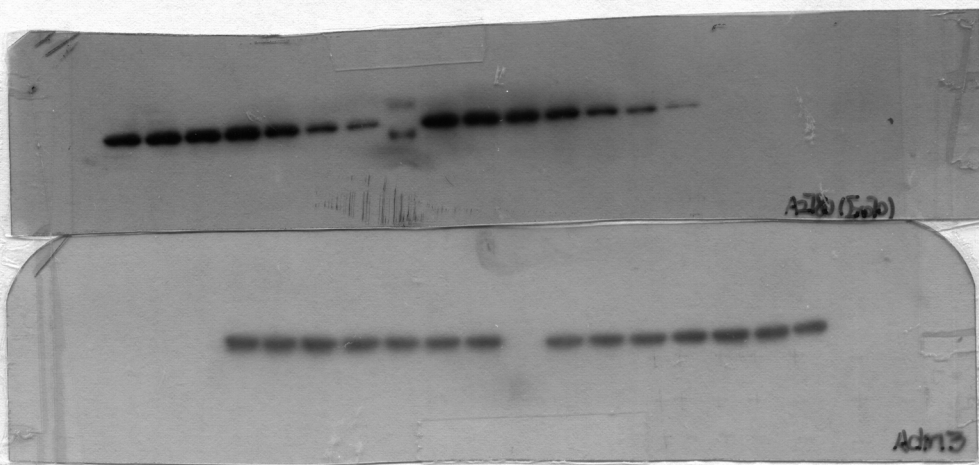

①

②

A2780

NH4Cl (-) / (+)

CHX 0 12 24 36 48 60 72 h

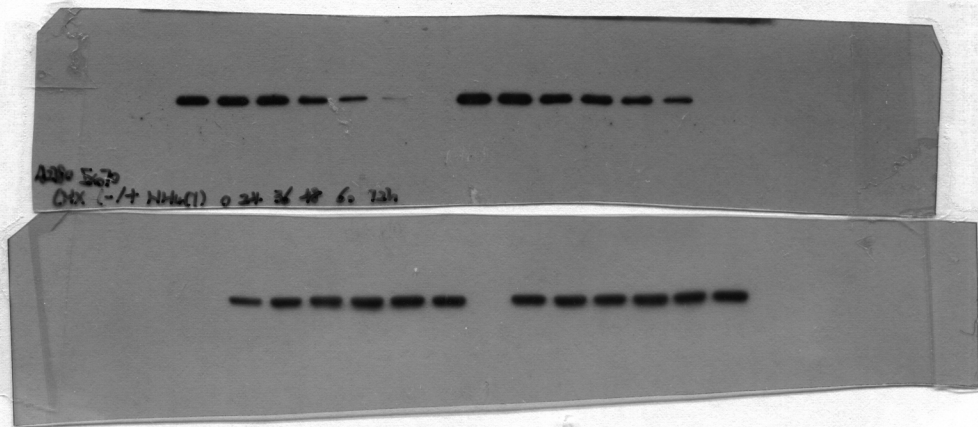

③

A2780/A280C3

Exo70 / LC3  
Actin

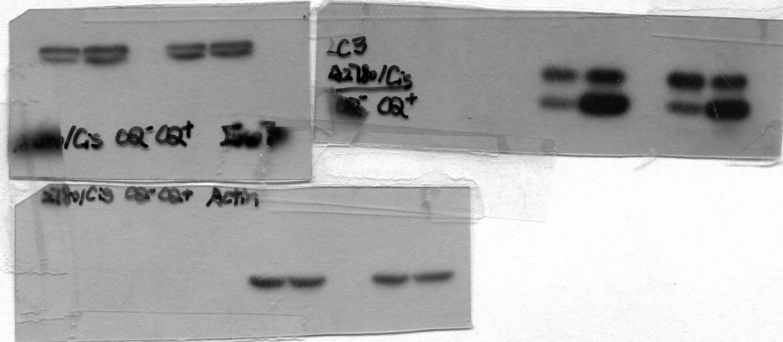

SK00-3  
Rapa (200nM) 0 6 18 h

Exo70 / LC3  
Actin

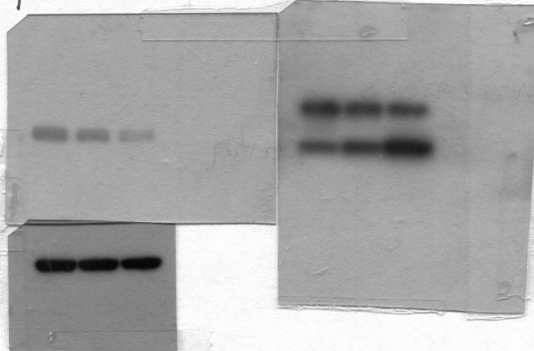

BafA1 (200nM) 0 6 18 h

Exo70 / LC3  
Actin

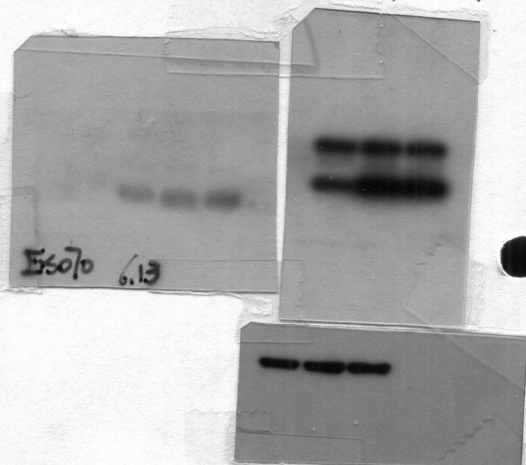

④

A2780  
shCtrl shATG5-1 shATG5-2  
± ATG5 ± Actin

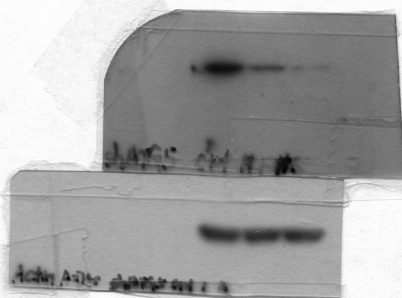

⑤

A2780  
shCtrl / shATG5-1 / shATG5-2  
CHX (100nM) 0 24 48 72h

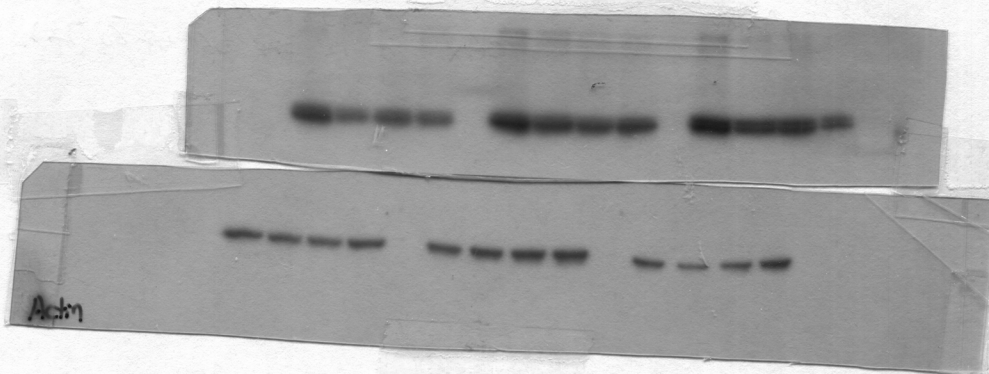

⑥

A2780  
210-myc - - + + + + +  
Exo70-Flag - + - + + + +  
OR - - - - + - +  
MG132 - - - - - + +

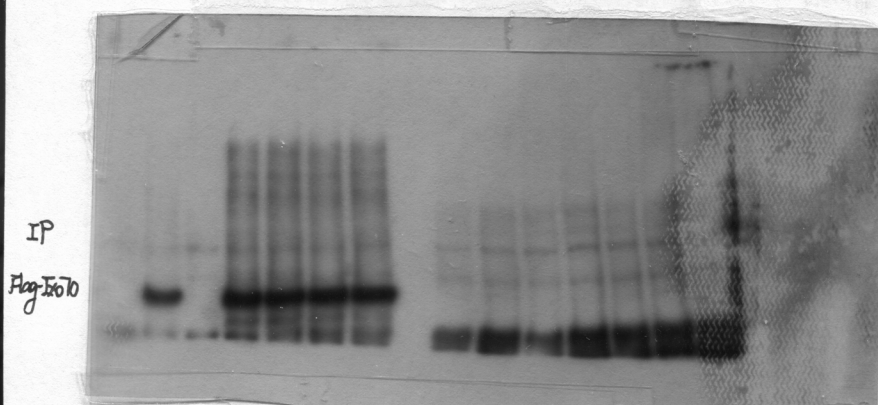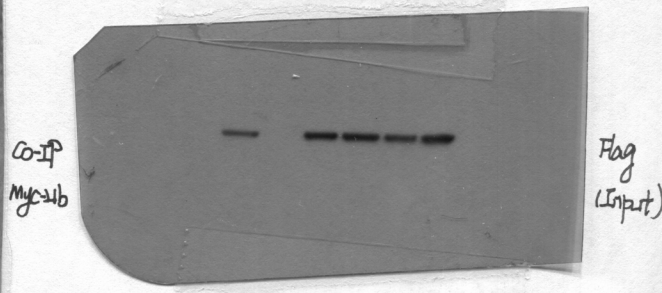



Figure 5

⑦ A2780 Cisplatin 25  $\mu$ M

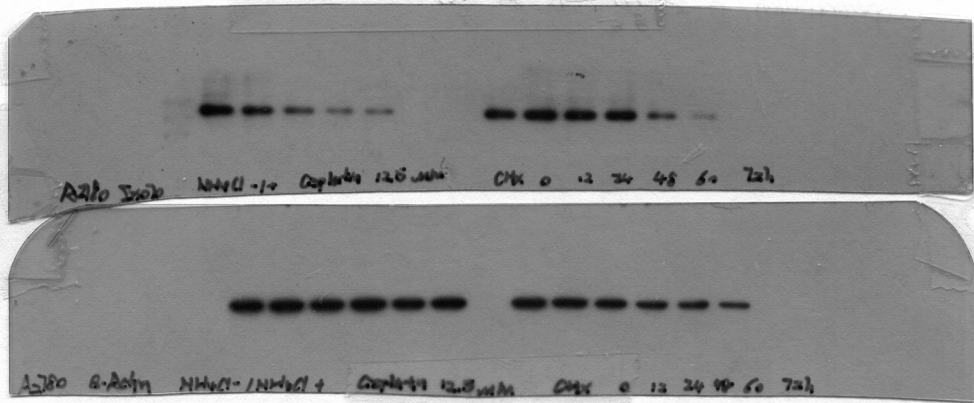

⑧ A2780 Cisplatin 50  $\mu$ M

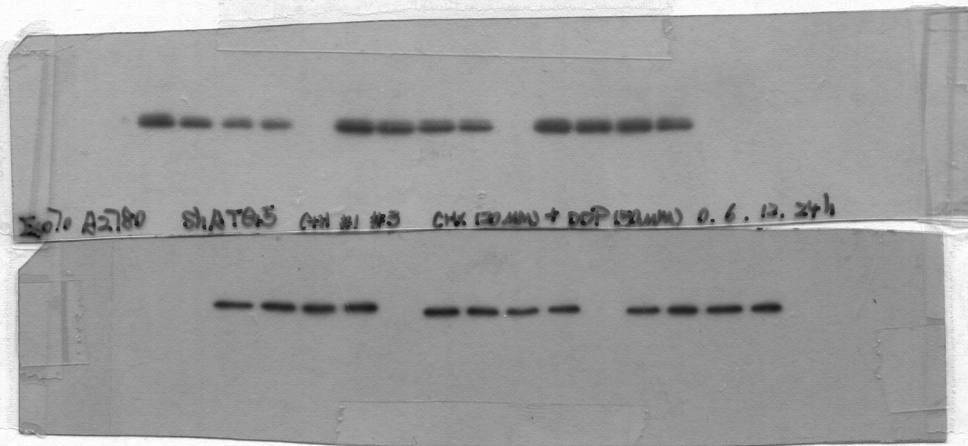

⑨ A2780 / A2780Cis

Cisplatin ( $\mu$ M) 0 25 50 100

左 A2780 右 A2780Cis

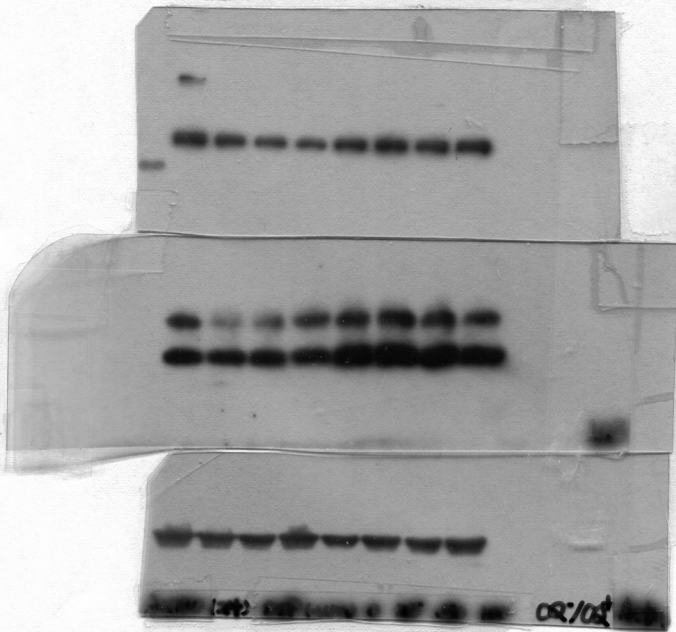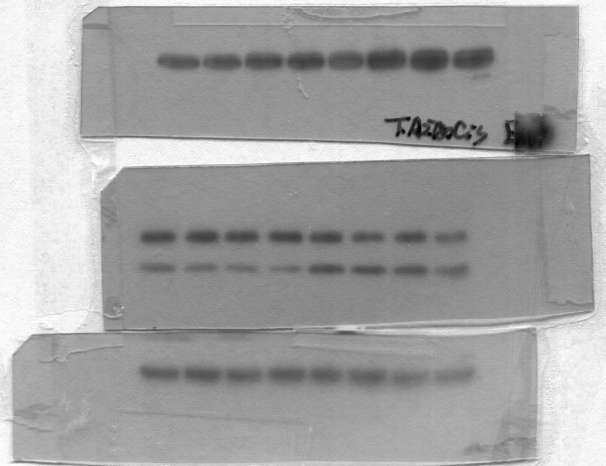

⑩ A2780Cis  
Cisplatin + -  
Rap - + - +  
Cis + + + +

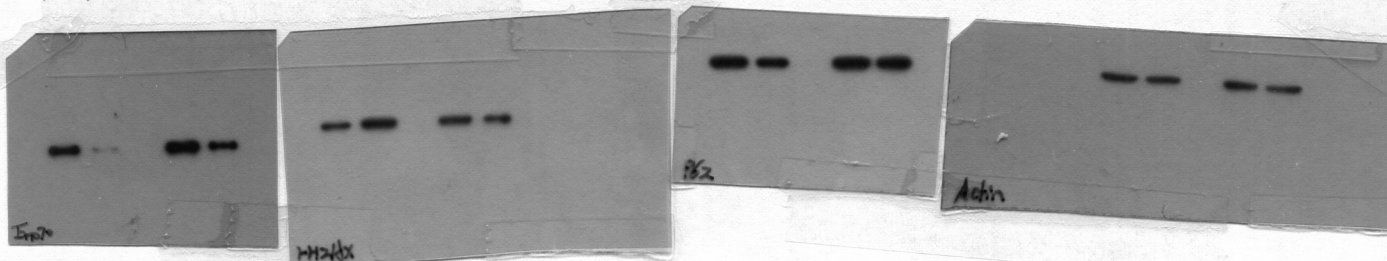

11

A2780      A2780Cis  
Cisplatin (μM)   0   25   50      0   25   50

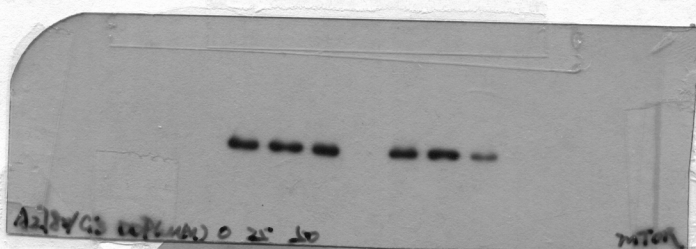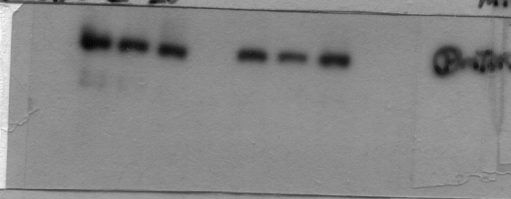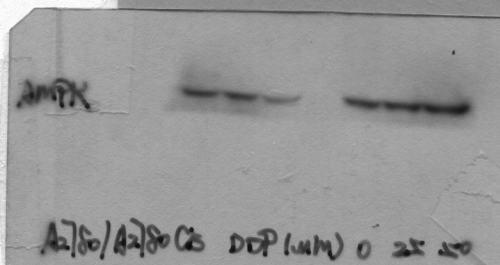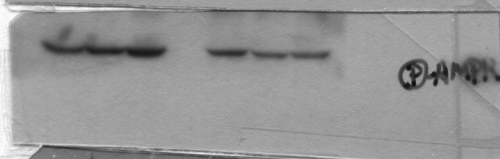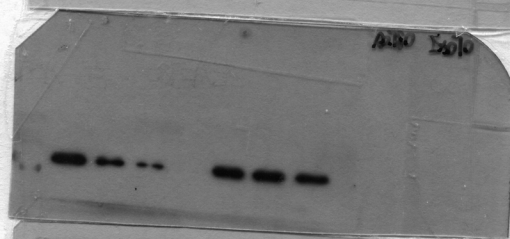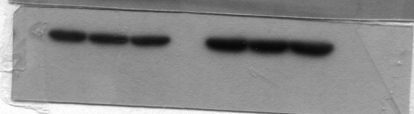



Figure 6

① A2780Cs shCtrl shExo70-1 shExo70-2

Exo70

Actin

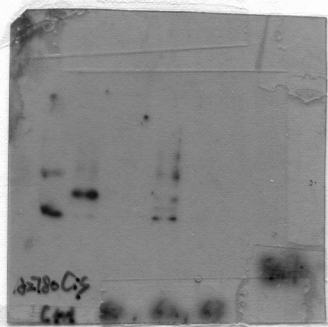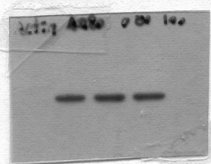

②

shCtrl

shExo70-1

shExo70-2

Cisplatin (μM)

0 25 50 100

↑ rH2AX

↓ Actin

A2780Cs Ctrl/62/63 cisplatin (μM) 0 25 50 100 rH2AX

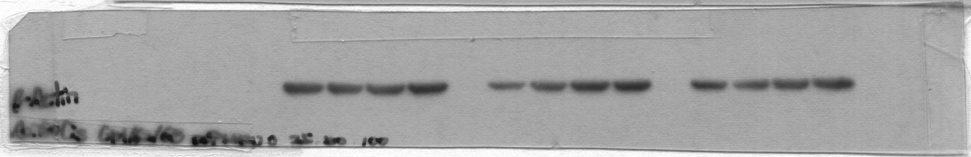

③

A2780Cs

shCtrl shExo70-1 shExo70-2

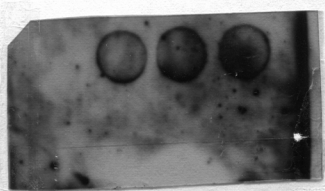

④

A2780Cs

ES (-) / (+)

Cisplatin

- + - +

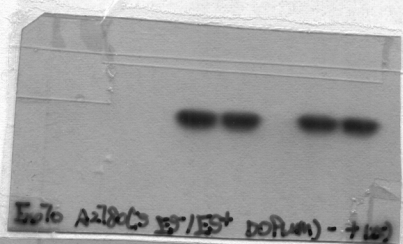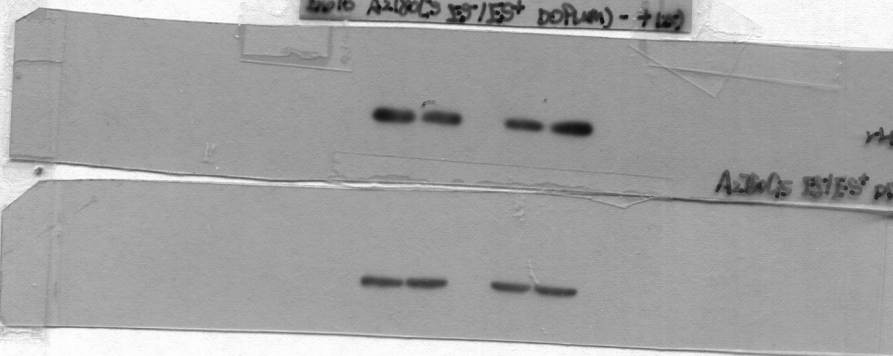

Supplement: s1 [file s1]
