# Supplementary material for: Deregulation of Exo70 Facilitates Innate and Acquired Cisplatin Resistance in Epithelial Ovarian Cancer by Promoting Cisplatin Efflux
Source: MDPI journal article supplement (doi:10.3390/cancers13143467), 2021-07-11
Supplement: s1 [file s1]

Supplementary Materials

# Deregulation of Exo70 Facilitates Innate and Acquired Cisplatin Resistance in Epithelial Ovarian Cancer by Promoting Cisplatin Efflux

| Test Results for Submitted Sample |    |      | DSMZ Reference Database Profile |     |
|-----------------------------------|----|------|---------------------------------|-----|
| Query Profile: S                  |    |      | Database Profile: SK-OV-3       |     |
| Loci                              |    |      |                                 |     |
| Amelogenin                        | X  |      | X                               |     |
| D3S1358                           | 14 |      |                                 |     |
| D13S317                           | 8  | 11   | 8                               | 11  |
| D7S820                            | 13 | 14   | 13                              | 14  |
| D16S539                           | 12 |      | 12                              |     |
| Penta E                           | 5  | 13   |                                 |     |
| TPOX                              | 8  | 11   | 8                               | 11  |
| TH01                              | 9  | 9.3  | 9                               | 9.3 |
| D2S1338                           | 18 | 23   |                                 |     |
| CSF1PO                            | 11 |      | 11                              |     |
| Penta D                           | 12 | 13   |                                 |     |
| D19S433                           | 14 | 14.2 |                                 |     |
| vWA                               | 17 | 18   | 17                              | 18  |
| D21S11                            | 30 | 31.2 |                                 |     |
| D18S51                            | 16 | 17   |                                 |     |
| D6S1043                           | 12 |      |                                 |     |
| D8S1179                           | 14 | 15   |                                 |     |
| D5S818                            | 11 |      | 11                              |     |
| D12S391                           | 22 |      |                                 |     |
| FGA                               | 24 | 25   |                                 |     |

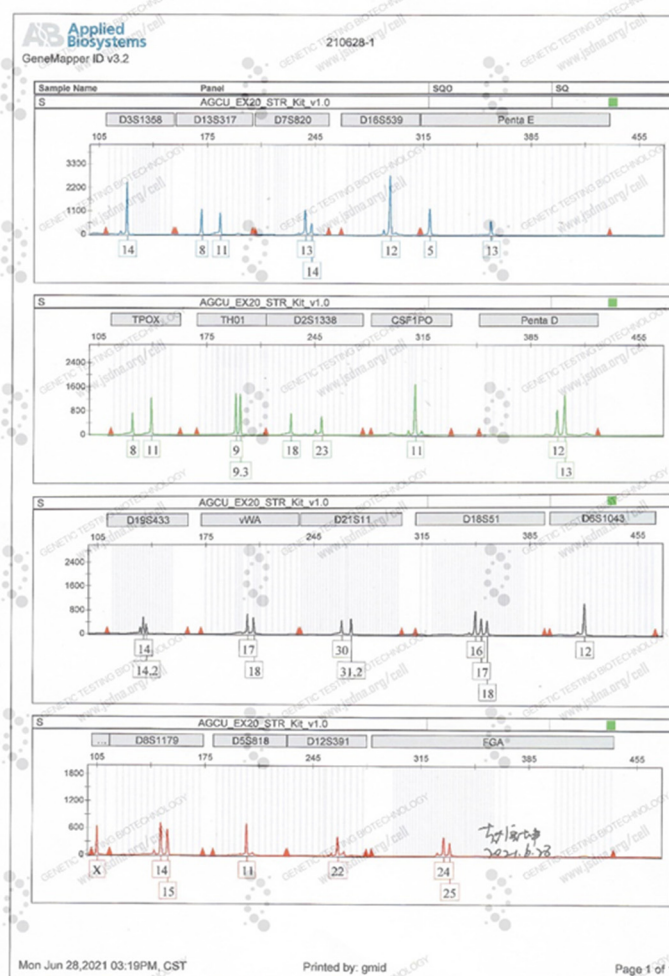

| Test Results for Submitted Sample |                      |      | DSMZ Reference Database Profile |  |
|-----------------------------------|----------------------|------|---------------------------------|--|
| Loci                              | Query Profile: 3-166 |      | Database Profile: NIH.OVCAR-3   |  |
| Amelogenin                        | X                    |      | X                               |  |
| D3S1358                           | 17                   | 18   |                                 |  |
| D13S317                           | 12                   |      | 12                              |  |
| D7S820                            | 10                   |      | 10                              |  |
| D16S539                           | 12                   |      | 12                              |  |
| Penta E                           | 7                    | 13   |                                 |  |
| TPOX                              | 8                    |      | 8                               |  |
| TH01                              | 9                    | 9.3  | 9 9.3                           |  |
| D2S1338                           | 17                   | 21   |                                 |  |
| CSF1PO                            | 11                   | 12   | 11 12                           |  |
| Penta D                           | 12                   | 13   |                                 |  |
| D19S433                           | 16.2                 |      |                                 |  |
| vWA                               | 17                   |      | 17                              |  |
| D21S11                            | 29                   | 31.2 |                                 |  |
| D18S51                            | 13                   |      |                                 |  |
| D6S1043                           | 10                   | 11   |                                 |  |
| D8S1179                           | 10                   | 15   |                                 |  |
| D5S818                            | 11                   | 12   | 11 12                           |  |
| D12S391                           | 19                   | 22   |                                 |  |
| FGA                               | 21                   |      |                                 |  |

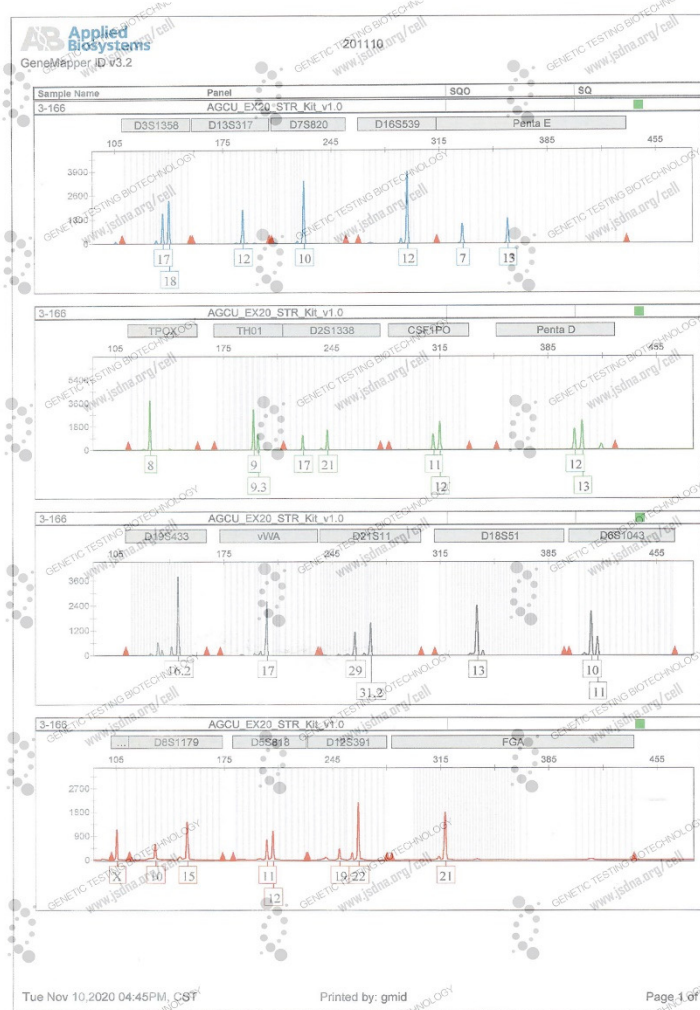

| Test Results for Submitted Sample |                     |    | ExpASy Reference Database Profile |    |
|-----------------------------------|---------------------|----|-----------------------------------|----|
| Loci                              | Query Profile: 3-11 |    | Database Profile: A2780           |    |
| Amelogenin                        | X                   |    | X                                 |    |
| D3S1358                           | 14                  | 16 |                                   |    |
| D13S317                           | 12                  | 13 | 12                                | 13 |
| D7S820                            | 10                  |    | 10                                |    |
| D16S539                           | 11                  | 13 | 11                                | 13 |
| Penta E                           | 10                  | 13 |                                   |    |
| TPOX                              | 8                   | 10 | 8                                 | 10 |
| TH01                              | 6                   |    | 6                                 |    |
| D2S1338                           | 21                  | 22 |                                   |    |
| CSF1PO                            | 10                  | 11 | 10                                | 11 |
| Penta D                           | 8                   | 9  |                                   |    |
| D19S433                           | 12                  |    |                                   |    |
| vWA                               | 15                  | 16 | 15                                | 16 |
| D21S11                            | 28                  | 29 |                                   |    |
| D18S51                            | 17                  |    |                                   |    |
| D6S1043                           | 11                  | 17 |                                   |    |
| D8S1179                           | 15                  | 17 |                                   |    |
| D5S818                            | 10                  | 13 | 11                                | 12 |
| D12S391                           | 19                  | 20 |                                   |    |
| FGA                               | 19                  | 24 |                                   |    |

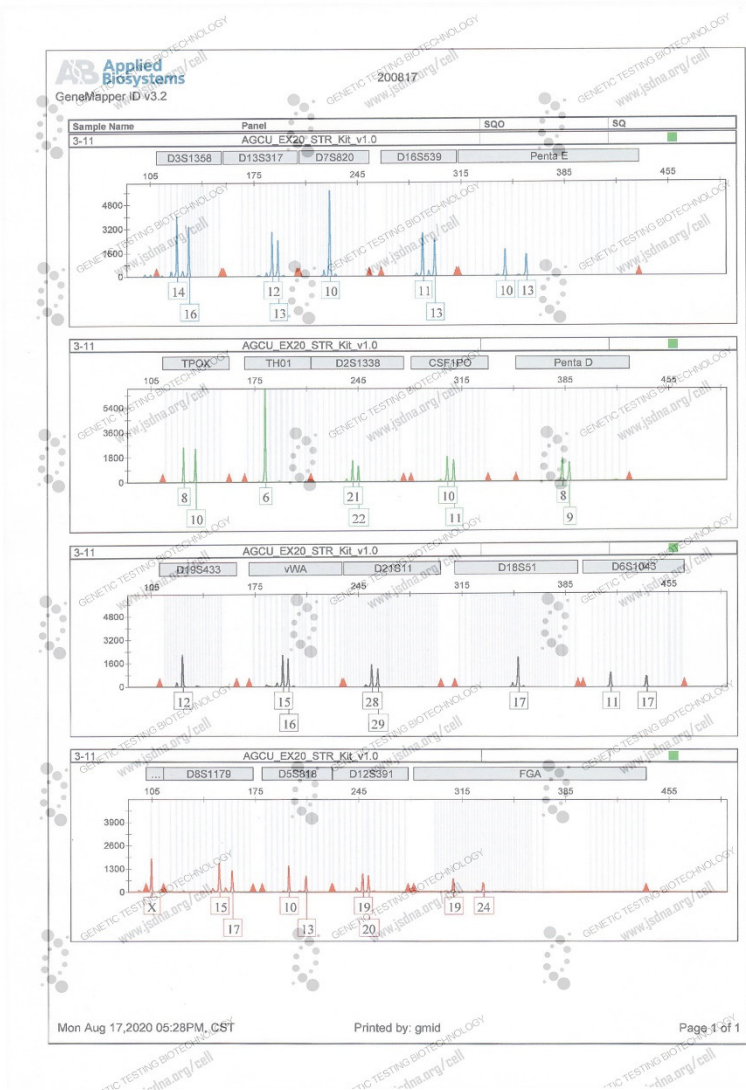

Figure S8. STR profile for cell lines.
