# Supplementary material for: Deregulation of Exo70 Facilitates Innate and Acquired Cisplatin Resistance in Epithelial Ovarian Cancer by Promoting Cisplatin Efflux
Source: MDPI journal article supplement (doi:10.3390/cancers13143467), 2021-07-11
Supplement: s1 [file s1]

Supplementary Materials:

# Deregulation of Exo70 Facilitates Innate and Acquired Cisplatin Resistance in Epithelial Ovarian Cancer by Promoting Cisplatin Efflux

Yujie Zhao, Xiaoting Hong, Xiong Chen, Chun Hu, Weihong Lu, Baoying Xie, Linhai Zhong, Wenqing Zhang, Hanwei Cao, Binbin Chen, Qian Liu, Yanyan Zhan, Li Xiao and Tianhui Hu

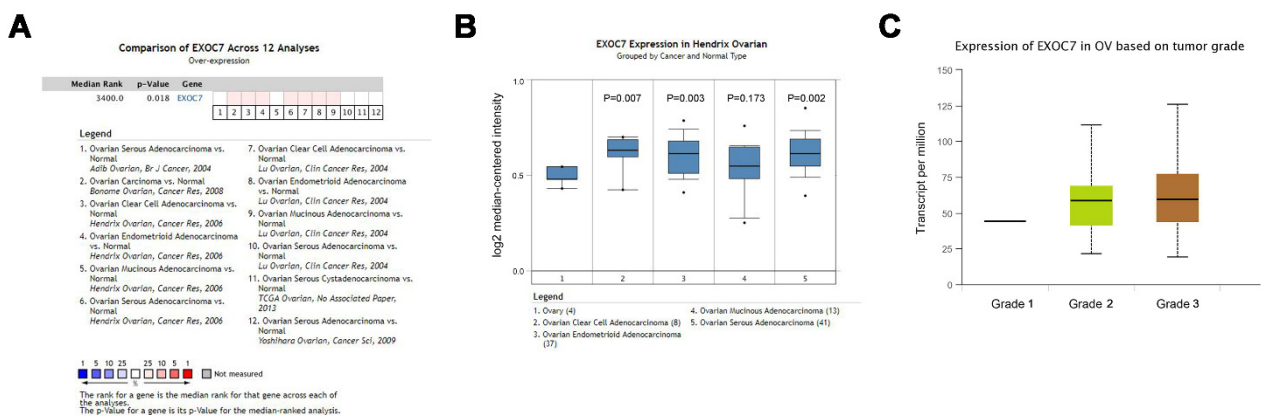

**Figure S1.** EXOC7 was highly expressed in EOC samples. (A) Comparison of EXOC7 between ovarian cancer and normal tissue across 12 analyses by Oncomine database. (B) EXOC7 was highly expressed in EOC samples compare to normal ovary tissue. Data were generated from the Hendrix Ovarian dataset (Serous vs normal  $P = 0.007$ ; Mucinous vs normal  $P = 0.003$ ; Endometrioid vs. normal  $P = 0.173$ ; Clear cell vs. normal  $P = 0.002$ ). (C) The expression level of EXOC7 increased with the EOC progressions. Data were generated from the UALCAN database.

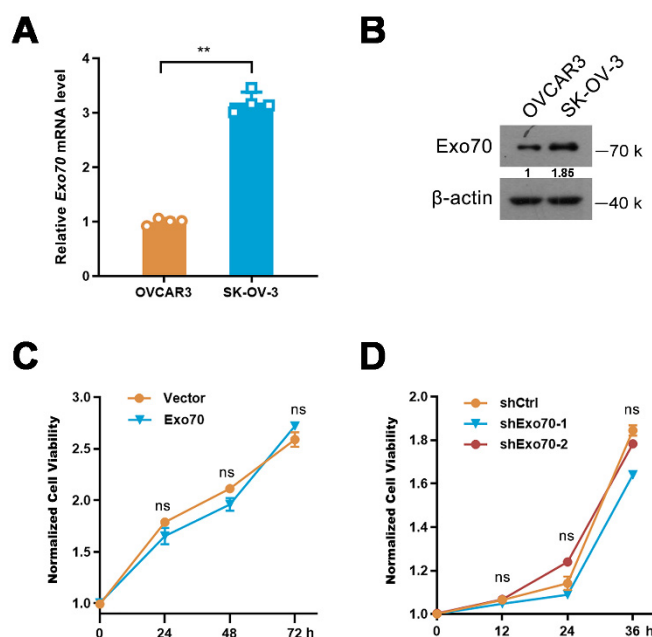

**Figure S2.** Exo70 expression did not affect the growth ratio of EOC cells. (A) RT-PCR showed the Exo70 mRNA levels in OVCAR3 and SK-OV-3 cells. Data were expressed as mean  $\pm$  SEM,  $n = 3$ . \*\*,  $P < 0.01$ . (B) Western blotting showed the Exo70 protein expressions in OVCAR3 and SK-OV-3 cells. (C) CCK8 assay measured the effect of overexpressing Exo70 on the proliferation of OVCAR3 cells; Data were expressed as mean  $\pm$  SEM,  $n = 3$ . ns: not significant. (D) CCK8 assay was carried out to measure the effect of knockdown Exo70 on the proliferation of SK-OV-3 cells. Data were expressed as mean  $\pm$  SEM,  $n = 3$ . ns: not significant.

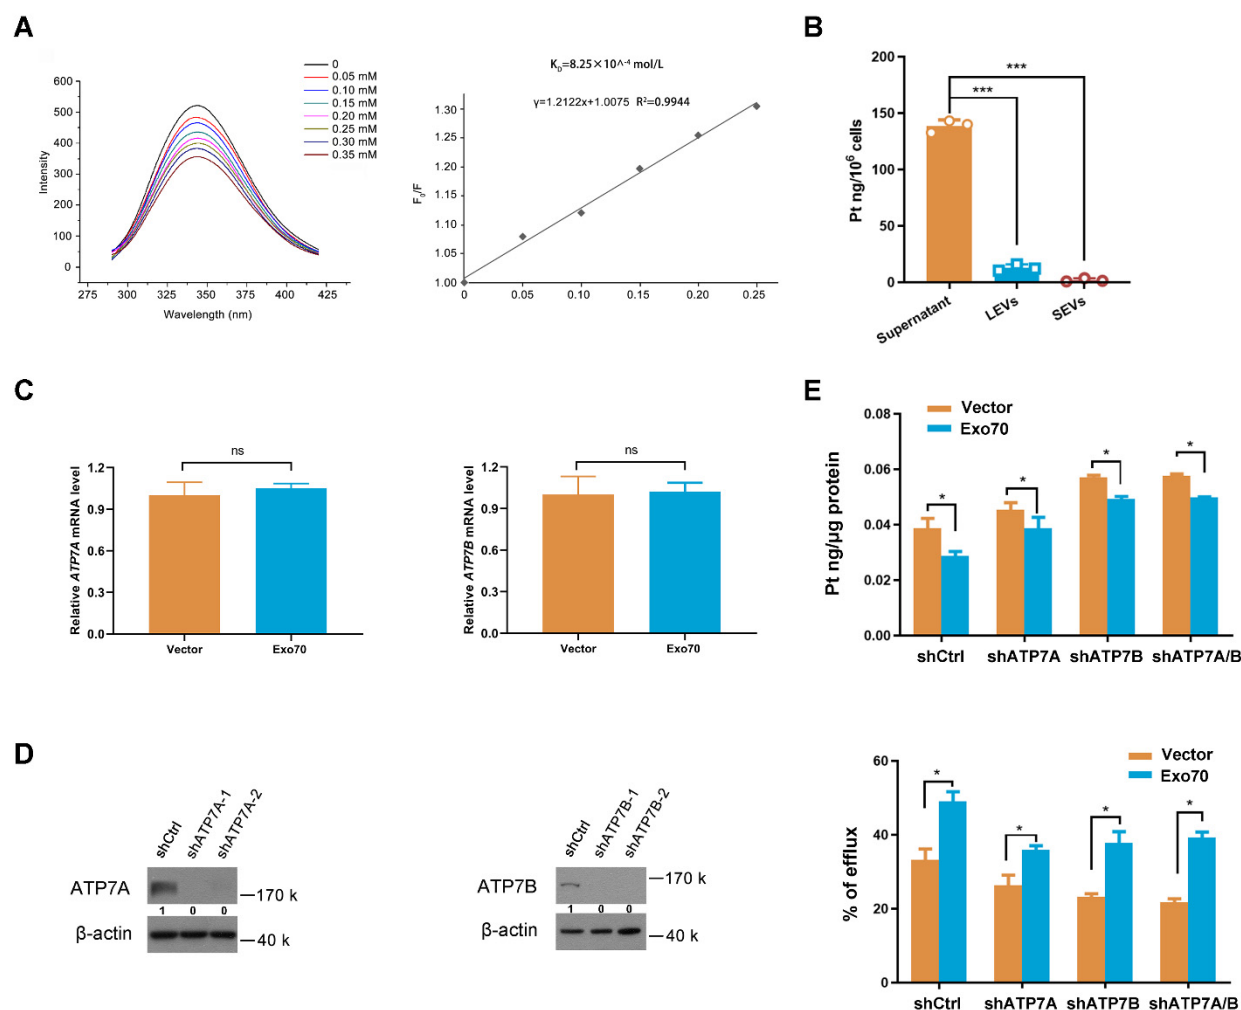

**Figure S3.** Exo70 efflux cisplatin to supernatant independent of ATP7A and ATP7B. (A) Fluorescence quenching assay was carried out to exam the binding ability of Exo70 protein and cisplatin.  $K_D = 8.25 \times 10^{-4} \text{ mol/L}$ . (B) ICP-MS assay was carried out to test the cisplatin distributions in different components of the culture medium. Data were expressed as mean  $\pm$  SEM,  $n = 3$ . \*\*\*,  $P < 0.001$ . LEVs: large extracellular vesicles, SEVs: small extracellular vesicles. (C) RT-PCR showed the ATP7A and ATP7B mRNA levels in cells. Data were expressed as mean  $\pm$  SEM,  $n = 3$ . ns: not significant. (D) The knock-down of ATP7A or ATP7B by shRNA in OVCAR3 cells were shown by western blotting. (E) ICP-MS assays were carried out to test the effects of knockdown ATP7A or ATP7B on the intracellular and extracellular cisplatin distributions in OVCAR3 cells. Data were expressed as mean  $\pm$  SEM,  $n = 3$ . \*,  $P < 0.05$ .

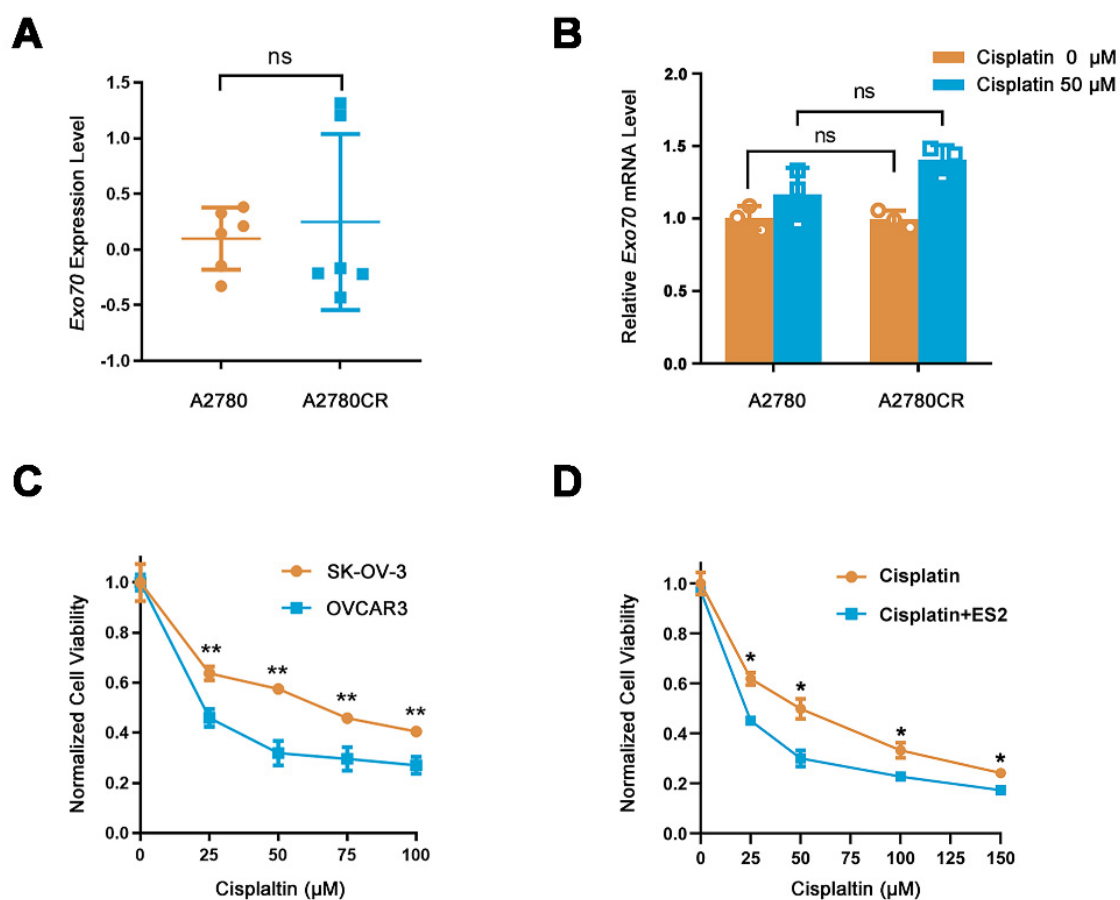

**Figure S4.** Exo70 affected the sensitivity of cells to cisplatin. **(A)** Exo70 mRNA expression levels were evaluated in datasets from GEO (GSE 33482) by comparing cisplatin-sensitive A2780 cells vs cisplatin-resistant A2780 cells. **(B)** RT-PCR showed the Exo70 mRNA expression levels in A2780 and A2780CR cells. Data were expressed as mean  $\pm$  SEM,  $n = 3$ . ns: not significant. **(C)** CCK8 assay showed the cytotoxicity of cisplatin in OVCAR3 and SK-OV-3 cells. Cells were treated with different doses of cisplatin for 24 hours. \*\*,  $P < 0.01$ . **(D)** CCK8 assay was carried out to examine the cytotoxicity of cisplatin in SK-OV-3 cells with or without ES2 (100  $\mu$ M) treatment. Data were presented as mean  $\pm$  SEM,  $n = 4$ . \*\*,  $P < 0.01$ .

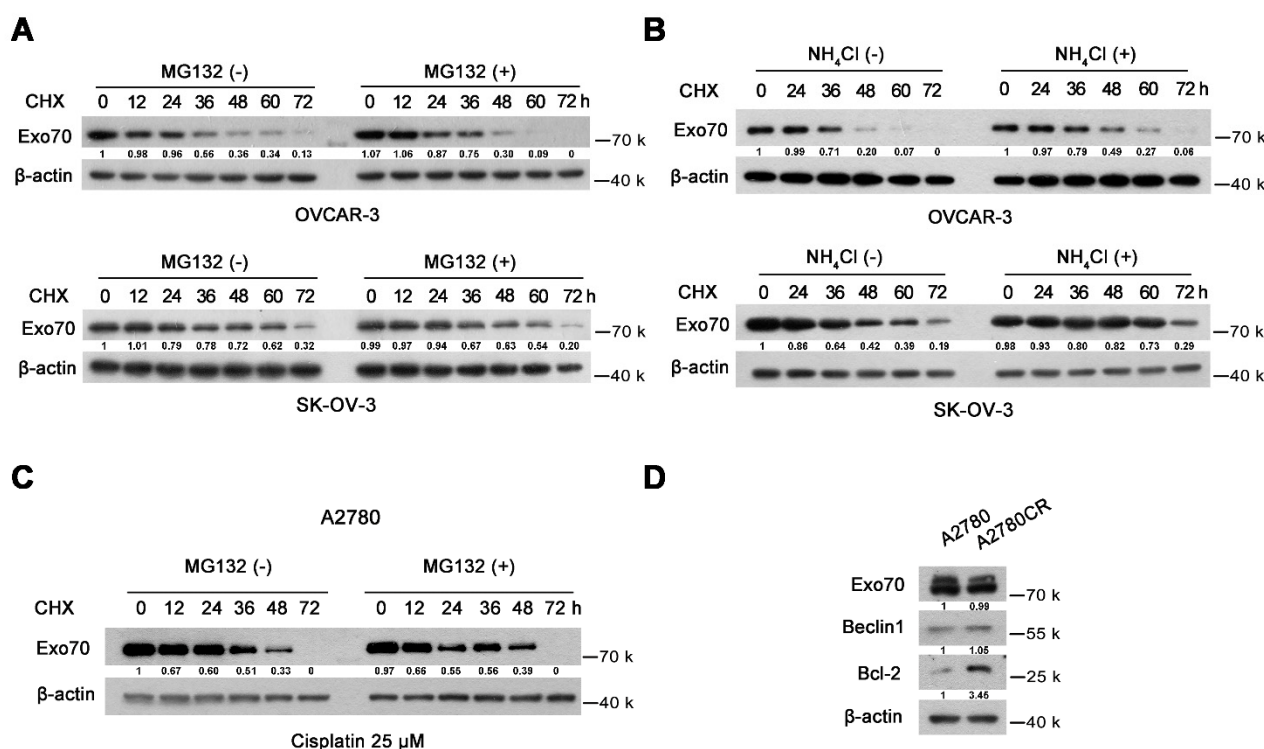

**Figure S5.** Autophagy affected the protein stability of Exo70. **(A)** Proteasome inhibitor MG132 did not alter the protein stability of Exo70 in OVCAR3 and SK-OV-3 cells. Cells were treated with 10 μM CHX together with or without 20 μM MG132. One of three experiments was shown. **(B)** Lysosome inhibitor NH<sub>4</sub>Cl altered the protein stability of Exo70 in OVCAR3 and SK-OV-3 cells. Cells were treated with 10 μM CHX together with or without 10 mM NH<sub>4</sub>Cl. One of three experiments was shown. **(C)** Western blotting was used to detect the half-lives of Exo70 in A2780 cells with 25 μM cisplatin treatment together with or without MG132. **(D)** Western blotting showed the expression level of Beclin1 and Bcl-2 in A2780 and A2780CR cells. One of three experiments was shown.

**Table S1.** Information of Antibodies.

| Antibody                             | Company                  | Product Number | RRID             |
|--------------------------------------|--------------------------|----------------|------------------|
| Anti-Exo70 (Rabbit)                  | Abcam                    | 118792         | RRID:AB_10901372 |
| Anti-Exo70 (Goat)                    | Abcam                    | 77352          | RRID:AB_1523581  |
| IgG-Isotype (Goat)                   | Abcam                    | 172730         | RRID:AB_2687931  |
| Anti-LC3B (Rabbit)                   | Novus                    | NB100-2220     | RRID:AB_10003146 |
| Anti-phospho-Histone H2A.X (Rabbit)  | CST                      | 9720           | RRID:AB_10692910 |
| Anti-mTOR (Rabbit)                   | CST                      | 2972           | RRID:AB_330978   |
| anti-phospho-mTOR (Ser2448) (Rabbit) | CST                      | 5536           | RRID:AB_10691552 |
| anti-AMPKα (Rabbit)                  | CST                      | 2532           | RRID:AB_330331   |
| anti-phospho-AMPKα (Thr172) (Rabbit) | CST                      | 2535           | RRID:AB_331250   |
| Anti-Ubiquitin (Rabbit)              | CST                      | 3933           | RRID:AB_2180538  |
| Anti-ATG5 (Rabbit)                   | CST                      | 12994          | RRID:AB_2630393  |
| Anti-ATG7 (Rabbit)                   | CST                      | 8558           | RRID:AB_10831194 |
| Anti-ATG12 (Rabbit)                  | CST                      | 4180           | RRID:AB_1903898  |
| Anti-ATG16L1 (Rabbit)                | CST                      | 8089           | RRID:AB_10950320 |
| Anti-Beclin1 (Rabbit)                | CST                      | 3495           | RRID:AB_1903911  |
| Anti-BCL2 (Mouse)                    | CST                      | 15071          | RRID:AB_2744528  |
| Anti-PIK3R4 (Rabbit)                 | CST                      | 14580          | RRID:AB_2798523  |
| Anti-ATP7A (Mouse)                   | Santa Cruz Biotechnology | sc-376467      | RRID:AB_11150485 |

|                                     |               |            |                  |
|-------------------------------------|---------------|------------|------------------|
| Anti-ATP7B (Mouse)                  | Santa Cruz    | sc-373964  | RRID:AB_10920224 |
| Anti-Sec3 (Rabbit)                  | Proteintech   | 11690-1-AP | RRID:AB_2231500  |
| Anti-Sec5 (Rabbit)                  | Proteintech   | 12723-1-AP | RRID:AB_10734442 |
| Anti-Sec15 (Rabbit)                 | Proteintech   | 18420-1-AP | RRID:AB_10694431 |
| Anti-Flag (Mouse)                   | Sigma-Aldrich | F3165      | RRID:AB_259529   |
| Anti-HA (Mouse)                     | Sigma-Aldrich | H9658      | RRID:AB_260092   |
| Anti-c-Myc (Mouse)                  | Sigma-Aldrich | M4439      | RRID:AB_439694   |
| Anti-Cisplatin DNA adducts (Rabbit) | Sigma-Aldrich | MABE416    |                  |

**Table S2.** Sequences of oligonucleotide primers for shRNA construction.

| Target    | Sequence                    |
|-----------|-----------------------------|
| shExo70#1 | 5'-GCACAGAGACCGTGGGCAA-3'   |
| shExo70#2 | 5'-GCTGGTGTGTACATGAA-3'     |
| shATG5#1  | 5'-ATATCAGGATGAGATAAC-3'    |
| shATG5#2  | 5'-GCAGTGGCTGAGTGAACATCT-3' |
| shATG7#1  | 5'-GCTGCCTGTCCTGAAATAGAT-3' |
| shATG7#2  | 5'-GCAGAACAATTCCTTGCATTC-3' |
| shSec3#1  | 5'-TTTGGAGTTCCTCAGCTT-3'    |
| shSec3#2  | 5'-GAGTGGCTAAAGAGTACAGAT-3' |
| shSec5#1  | 5'-GCCTGGTATCTTATAGAGAAT-3' |
| shSec5#2  | 5'-CAATGTGCTTCAGCGATTTAA-3' |
| shSec15#1 | 5'-GCAGTTAACTTAGATGTCAT-3'  |
| shSec15#2 | 5'-CCCTTTCAAGATCCAGACCTT-3' |
| shATP7A#1 | 5'-GGAAGGGATGACCTGCCATTC-3' |
| shATP7A#2 | 5'-GCAGCCCAAGTACCTCAAATT-3' |
| shATP7B#1 | 5'-GCAGTGCCACTGTGAAATATG-3' |
| shATP7B#2 | 5'-GGGACCATGTAAATGACATGG-3' |

**Table S3.** Sequences of primers for real-time PCR.

| Gene         | Primers                                 |
|--------------|-----------------------------------------|
| <i>GAPDH</i> | Forward: 5'-TGCACCACCAACTGCTTAGC-3'     |
|              | Reverse: 5'-GGCATGGACTGTGGTCATGAG-3'    |
| <i>EXOC7</i> | Forward: 5'-GGAGTATTTCCAGGACAACAGC-3'   |
|              | Reverse: 5'-AAGATGAGCACGGGCGAGA-3'      |
| <i>ATG5</i>  | Forward: 5'-AACTGAAAGGGAAGCAGAACCA-3'   |
|              | Reverse: 5'-ATGCCATTTTCAGTGGTGTGCC-3'   |
| <i>ATG7</i>  | Forward: 5'-GCTTGTGCCTCACCAGGTTC-3'     |
|              | Reverse: 5'-GATGGTCTCATCATCGCTCATGTC-3' |
| <i>EXOC1</i> | Forward: 5'-ACCAAATGATGAACGCCTGC-3'     |
|              | Reverse: 5'-GGCATCTACCACAGCAAGAT-3'     |
| <i>EXOC2</i> | Forward: 5'-AAGAACTGGTCCCTCGGGTA-3'     |
|              | Reverse: 5'-TCGGGTGTCAGGTAAACAGC-3'     |
| <i>EXOC6</i> | Forward: 5'-CGGGTGAATCCAAACACAGC-3'     |
|              | Reverse: 5'-TCAGCTGTTTCACGACTGTCT-3'    |
| <i>ATP7A</i> | Forward: 5'-TGGACCATTGAGCAGCAGAT-3'     |
|              | Reverse: 5'-GTGACGCCGTAACAGTCAGA-3'     |
| <i>ATP7B</i> | Forward: 5'-TGGTCACCCTCCAACTGAGA-3'     |
|              | Reverse: 5'-GGGCTGGTACAAGAAGGGTC-3'     |

**Table S4.** Characteristics of the ten ovarian cancer patients.

| Platinum-sensitive |       |                       |
|--------------------|-------|-----------------------|
| Serial Number      | Stage | Pathological Type     |
| 1                  | II c  | Serous ovarian cancer |
| 2                  | III b | Serous ovarian cancer |
| 3                  | III c | Serous ovarian cancer |
| 4                  | III c | Serous ovarian cancer |
| 5                  | III c | Serous ovarian cancer |
| Platinum-resistant |       |                       |
| Serial Number      | Stage | Pathological Type     |
| 1                  | III a | Serous ovarian cancer |
| 2                  | III c | Serous ovarian cancer |
| 3                  | III c | Serous ovarian cancer |
| 4                  | III c | Serous ovarian cancer |
| 5                  | IV    | Serous ovarian cancer |

**Figure 2A**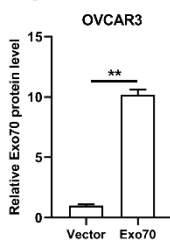**Figure 2C**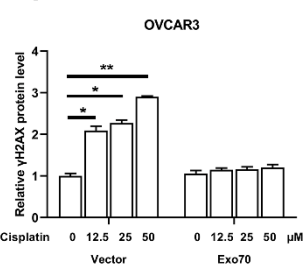**Figure 3E**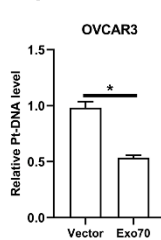**Figure 4B**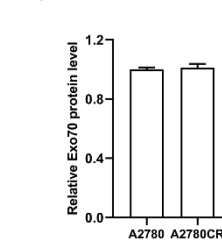**Figure 3F**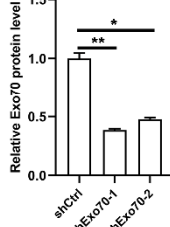**Figure 3G**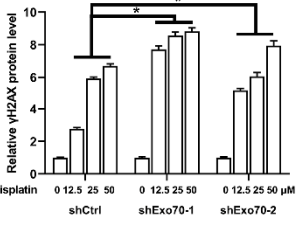**Figure 3H**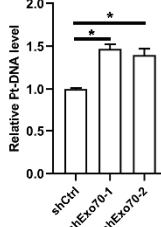**Figure 4D**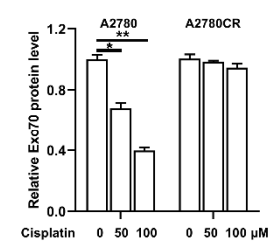**Figure 3I**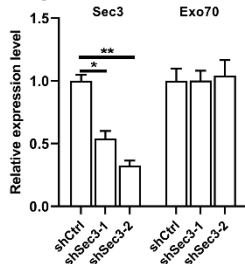**Figure 3J**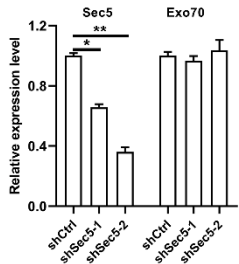**Figure 3K**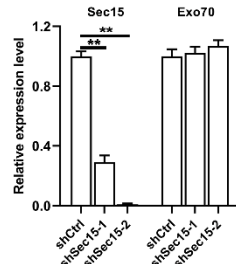

Figure 5A

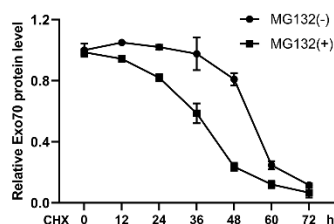

Figure 5B

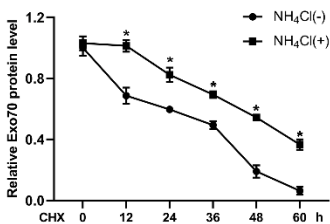

Figure 5D

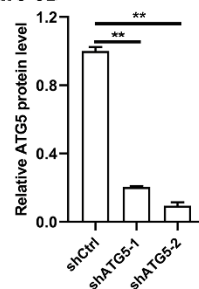

Figure 5C

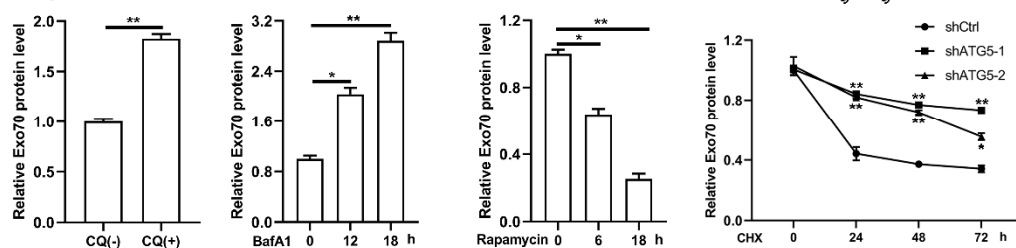

Figure 5F

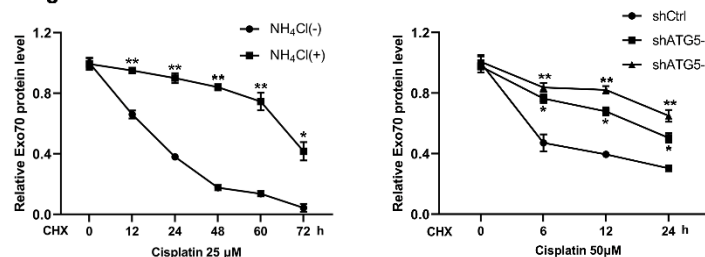

Figure 5H

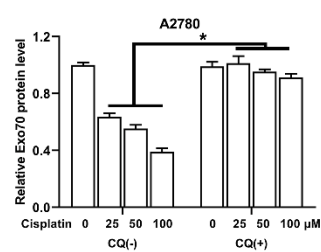

Figure 5J

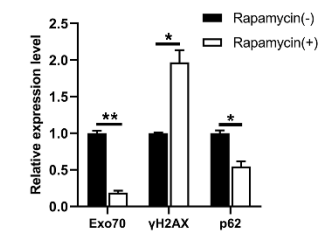

Figure 5I

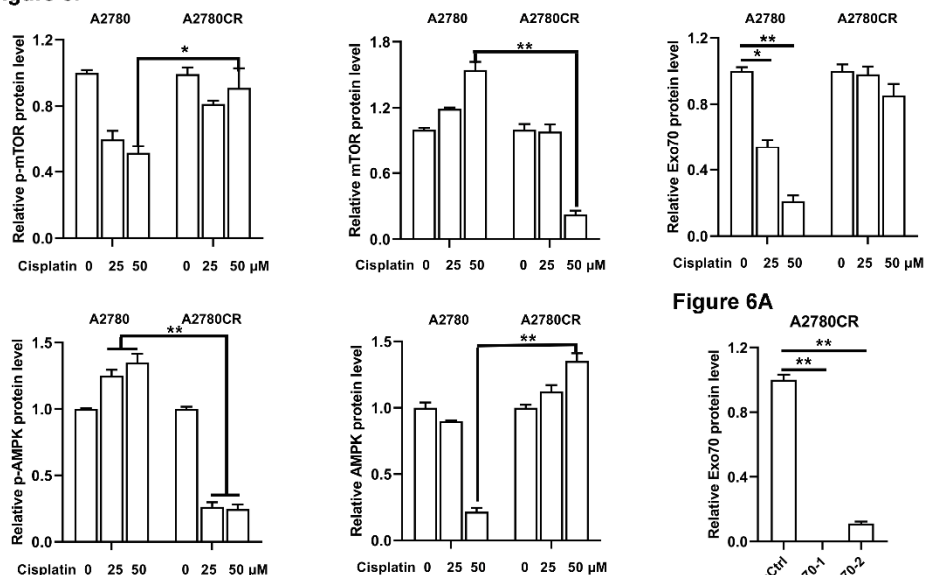

Figure 6A

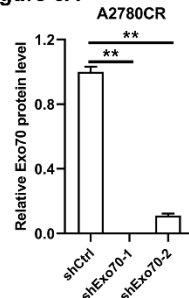

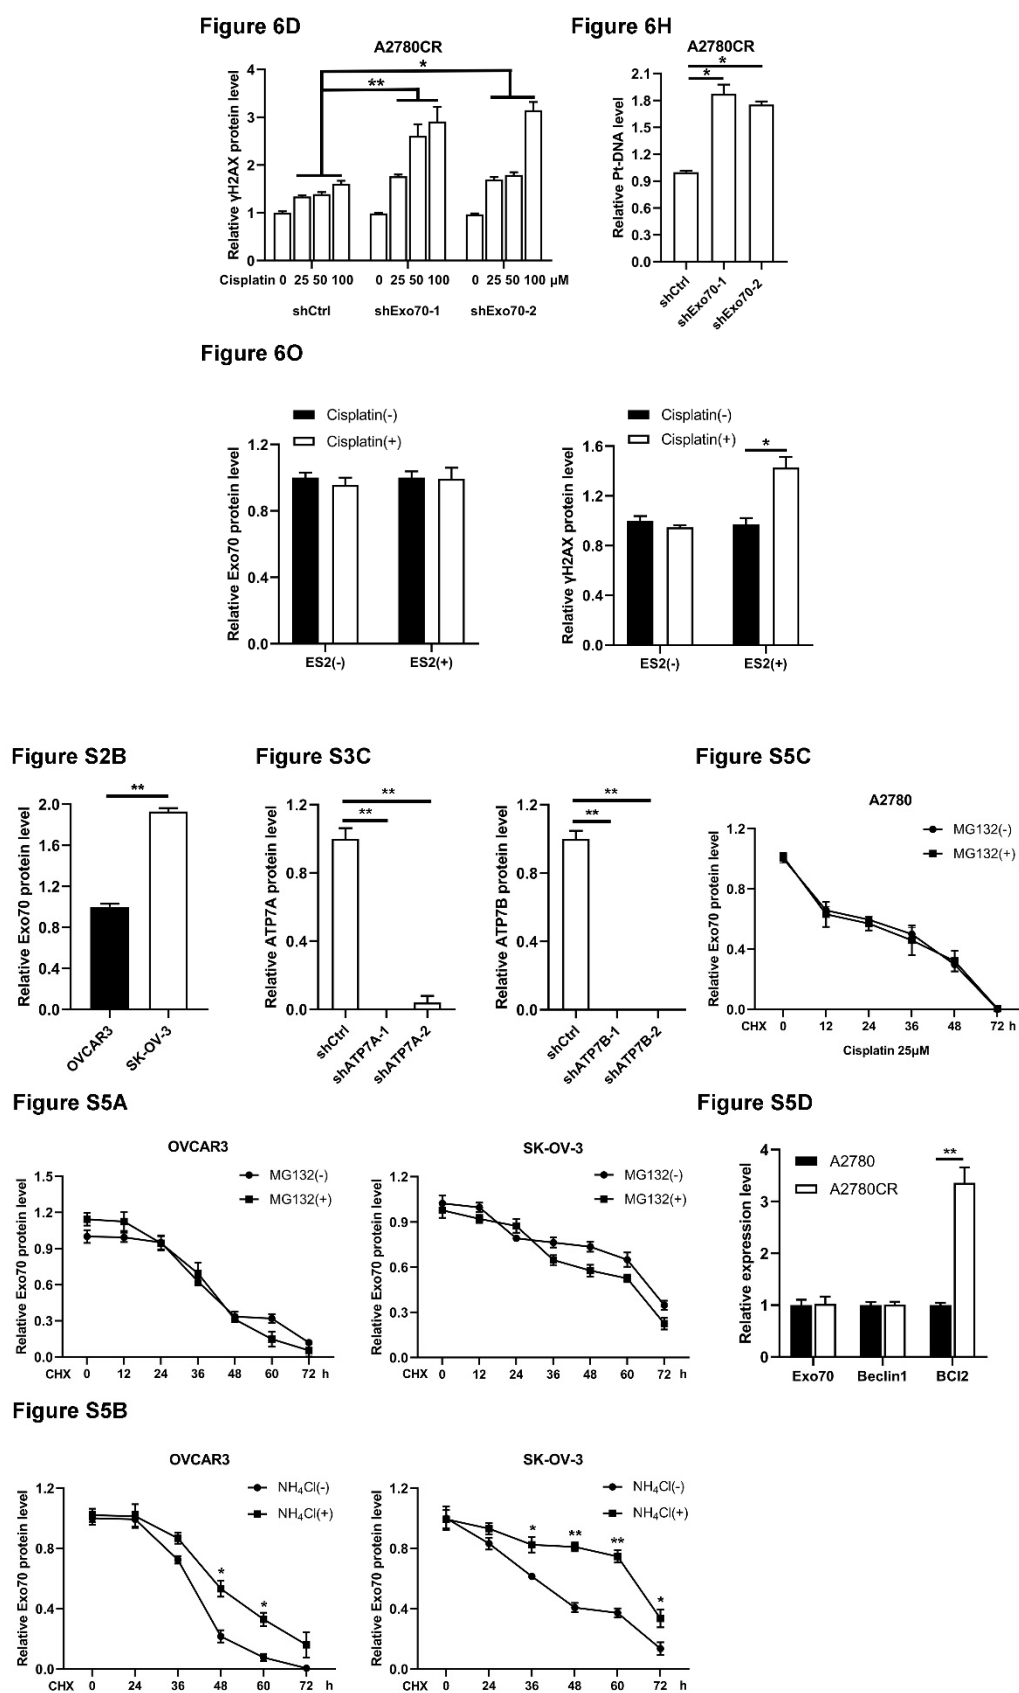

**Figure S6.** Quantification of Western Blot. Data were expressed as mean  $\pm$  SEM,  $n = 3$ . \*  $P < 0.05$ , \*\*  $P < 0.01$ .
